# Supplementary material
Source: publisher figshare collection journal article supplement (https://gsajournals.figshare.com/articles/dataset/_/9801638)
Supplement: Supplementary file 1 [file 1]

|                                       | Isogenic vs non-isogenic pairs with difference (20 total) (% of total) | GD pairs (10 total) | Up in GD isogenic   |
|---------------------------------------|------------------------------------------------------------------------|---------------------|---------------------|
|                                       |                                                                        |                     | Down in GD isogenic |
|                                       |                                                                        | KK pairs (10 total) | Up in KK isogenic   |
|                                       |                                                                        |                     | Down in KK isogenic |
| Fecundity                             | 8 (40%)                                                                | 4                   | 2                   |
|                                       |                                                                        |                     | 2                   |
|                                       |                                                                        | 4                   | 2                   |
|                                       |                                                                        |                     | 2                   |
| Survival upon oral infection          | 10 (50%)                                                               | 5                   | 1                   |
|                                       |                                                                        |                     | 4                   |
|                                       |                                                                        | 5                   | 1                   |
|                                       |                                                                        |                     | 4                   |
| Midgut mitosis in baseline conditions | 5 (25%)                                                                | 2                   | 1                   |
|                                       |                                                                        |                     | 1                   |
|                                       |                                                                        | 3                   | 0                   |
|                                       |                                                                        |                     | 3                   |
| Midgut mitosis upon oral infection    | 5 (25%)                                                                | 4                   | 1                   |
|                                       |                                                                        |                     | 3                   |
|                                       |                                                                        | 1                   | 0                   |
|                                       |                                                                        |                     | 1                   |
| Defecation rate upon oral infection   | 4 (20%)                                                                | 2                   | 0                   |
|                                       |                                                                        |                     | 2                   |
|                                       |                                                                        | 2                   | 1                   |
|                                       |                                                                        |                     | 1                   |
| Fecal pH upon oral infection          | 4 (20%)                                                                | 2                   | 2                   |
|                                       |                                                                        |                     | 0                   |
|                                       |                                                                        | 2                   | 0                   |
|                                       |                                                                        |                     | 2                   |
| Terminal branching in normoxia        | 2 (10%)                                                                | 0                   | 0                   |
|                                       |                                                                        |                     | 0                   |
|                                       |                                                                        | 2                   | 0                   |
|                                       |                                                                        |                     | 2                   |
| Terminal branching in hypoxia         | 2 (10%)                                                                | 0                   | 0                   |
|                                       |                                                                        |                     | 0                   |
|                                       |                                                                        | 2                   | 0                   |
|                                       |                                                                        |                     | 2                   |

**Table S2:** Isogenic and non-isogenic GD and KK transgenic *UAS-RNAi* lines present variable differences in various phenotypic traits in the absence of Gal4. The last column compares the isogenic and non-isogenic strains with regards to the direction of the phenotype (up: increased, and down: decreased in the isogenic when compared to the non-isogenic).
