# Supplementary material
Source: publisher figshare collection journal article supplement (https://gsajournals.figshare.com/articles/dataset/_/9801638)
Supplement: Supplementary file 2 [file 1]

|                                              | Isogenic vs non-isogenic pairs with difference (20 total) (% of total) | Isogenic vs non-isogenic pairs with >25% difference (% of total) | Isogenic vs non-isogenic pairs with >50% difference (% of total) |
|----------------------------------------------|------------------------------------------------------------------------|------------------------------------------------------------------|------------------------------------------------------------------|
| <b>Fecundity</b>                             | 8<br>(40%)                                                             | 7<br>(35%)                                                       | 5<br>(25%)                                                       |
| <b>Survival upon oral infection</b>          | 10<br>(50%)                                                            | 7<br>(35%)                                                       | 2<br>(10%)                                                       |
| <b>Midgut mitosis in baseline conditions</b> | 5<br>(25%)                                                             | 5<br>(25%)                                                       | 5<br>(25%)                                                       |
| <b>Midgut mitosis upon oral infection</b>    | 5<br>(25%)                                                             | 5<br>(25%)                                                       | 2<br>(10%)                                                       |
| <b>Defecation rate upon oral infection</b>   | 4<br>(20%)                                                             | 1<br>(5%)                                                        | 0<br>(0%)                                                        |
| <b>Fecal pH upon oral infection</b>          | 4<br>(20%)                                                             | 0<br>(0%)                                                        | 0<br>(0%)                                                        |
| <b>Terminal branching in normoxia</b>        | 2<br>(10%)                                                             | 0<br>(0%)                                                        | 0<br>(0%)                                                        |
| <b>Terminal branching in hypoxia</b>         | 2<br>(10%)                                                             | 0<br>(0%)                                                        | 0<br>(0%)                                                        |

**Table S3:** The intensity of the phenotypic differences in comparisons of isogenic and non-isogenic GD and KK transgenic *UAS-RNAi* lines varies in the absence of Gal4.
